# Supplementary material for: Flexible synthesis of Au@Pd core–shell mesoporous nanoflowers for efficient methanol oxidation
Source: Royal Society of Chemistry journal article supplement (doi:10.1039/d0nr08758k), 2021-01-01
Supplement: d0nr08758k1.pdf [file d0nr08758k1.pdf]

Electronic Supplementary Information for

**Flexible synthesis of Au@Pd core-shell mesoporous nanoflowers for efficient  
methanol oxidation**

Shuli Yin, Ziqiang Wang,\* Songliang Liu, Shiqian Jiao, Wenjing Tian, You Xu, Xiaonian Li,

Liang Wang\* and Hongjing Wang \*

State Key Laboratory Breeding Base of Green-Chemical Synthesis Technology, College of  
Chemical Engineering, Zhejiang University of Technology, Hangzhou 310014, P.R. China.

E-mails: zqwang@zjut.edu.cn; wangliang@zjut.edu.cn; hjw@zjut.edu.cn

## Characterization

The particle size and morphology of the samples were characterized by ZEISS Gemini 500 scanning electron microscope (SEM) operated at 5 kV. Transmission electron microscopy (TEM), and high-resolution TEM (HRTEM) were performed with a TalosS-FEG operated at 200 kV. The phase and crystallinity of the samples were studied by X-ray diffraction (XRD, PANalytical X'Pert Powder) using Cu K $\alpha$  radiation. X-ray photoelectron spectroscopy (XPS) measurements were conducted on the Thermo escalab 250Xi instrument using Al K $\alpha$  radiation ( $h\nu = 1486.6$  eV) operated at 150 W.

## Electrochemical measurements of the MOR

A CHI 660E electrochemical analyzer was used to measure the electrochemical performance. A traditional three-electrode cell including a working electrode (modified glassy carbon electrode), a counter electrode (Pt wire) and a reference electrode (Ag/AgCl electrode (3 M KCl)) was used. For the modification of the working electrode, 10  $\mu$ g of the catalyst was dropped on the surface of a clean glassy carbon electrode, followed by drying at 323 K. Then 3  $\mu$ L of Nafion (0.5%) was coated and left to dry at the same temperature. The current densities are normalized by the electrode area (0.071 cm<sup>2</sup>). The electrochemically active surface area (ECSA) of the catalyst was calculated from the area in the reduction peak of the Pd oxide using the following equation:  $ECSA = Q/(m \times q)$ , where  $Q$  is the surface charge for oxygen desorption,  $m$  is the metal loading and  $q$  is the charge of desorbing a monolayer of oxygen on the Pd surface (424  $\mu$ C cm<sup>-2</sup>). MOR investigations were conducted in 1 M KOH with 1 M CH<sub>3</sub>OH electrolyte at a scan rate of 50 mV s<sup>-1</sup>.

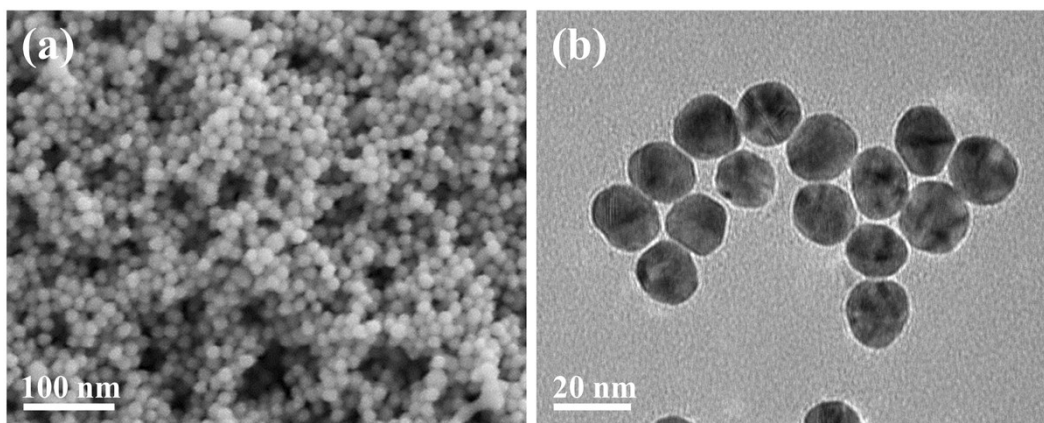

**Fig. S1** (a, b) SEM and TEM images of the Au nanoparticles.

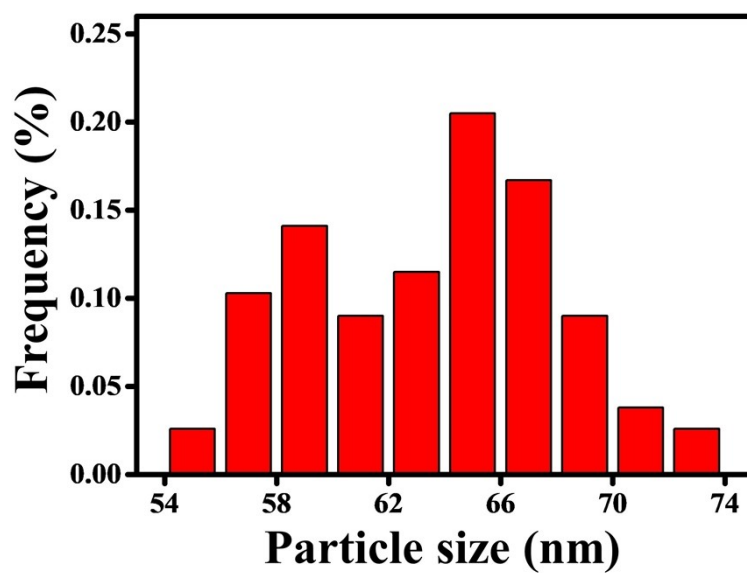

**Fig. S2** Size distribution histogram of the Au@mPd NFs.

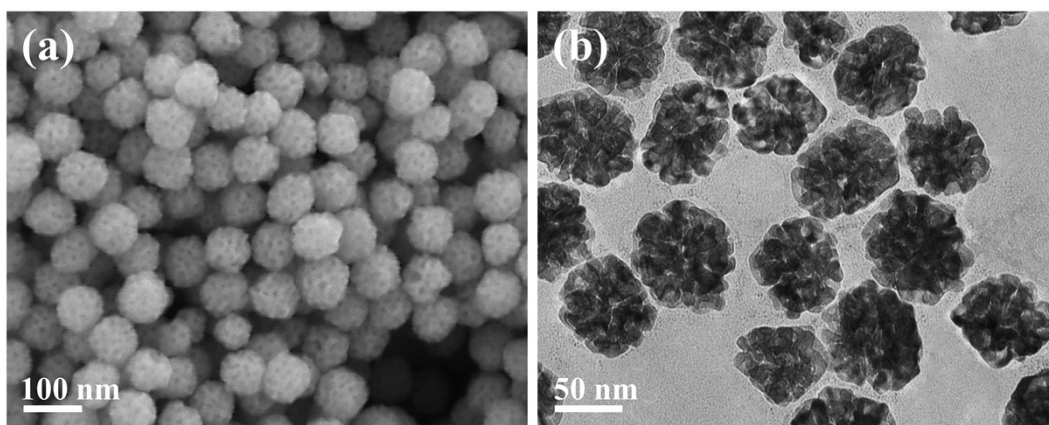

**Fig. S3** (a, b) SEM and TEM images of the mPd NFs.

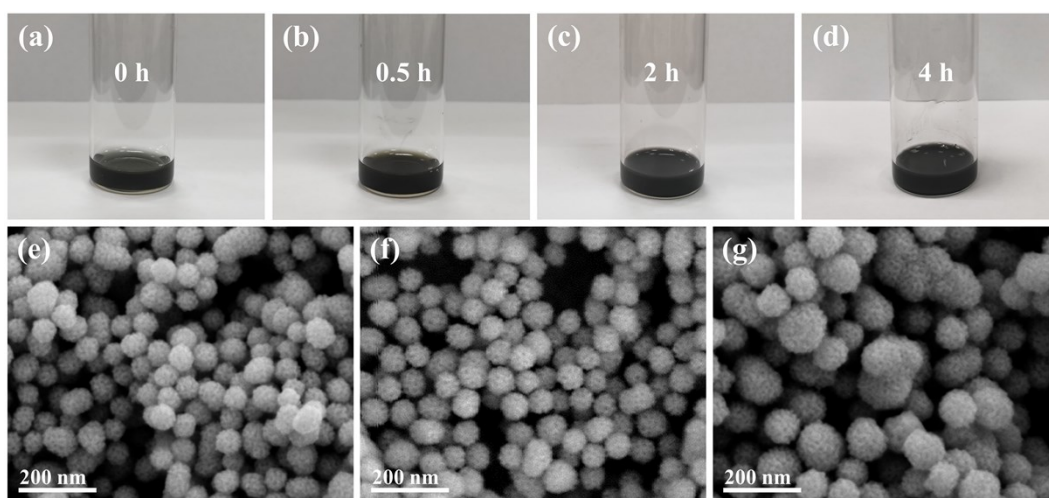

**Fig. S4** (a-d) Photographs of the colloidal suspensions of reaction solutions at different reaction times. (e-g) SEM images of Au@mPd NFs prepared from different reaction times: (e) 0.5 h, (f) 2 h and (g) 4 h.

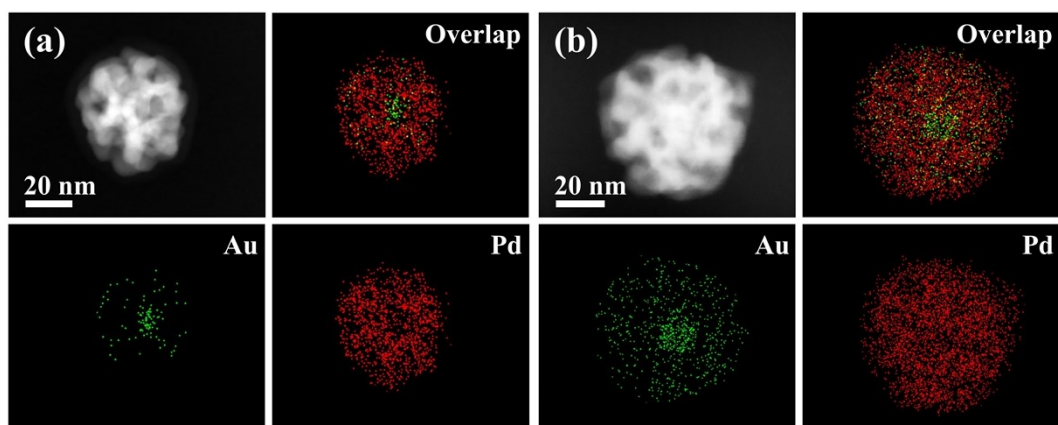

**Fig. S5** HAADF-STEM images and elemental mapping images of Au@mPd NFs prepared from different reaction times: (a) 0.5 h and (b) 4 h.

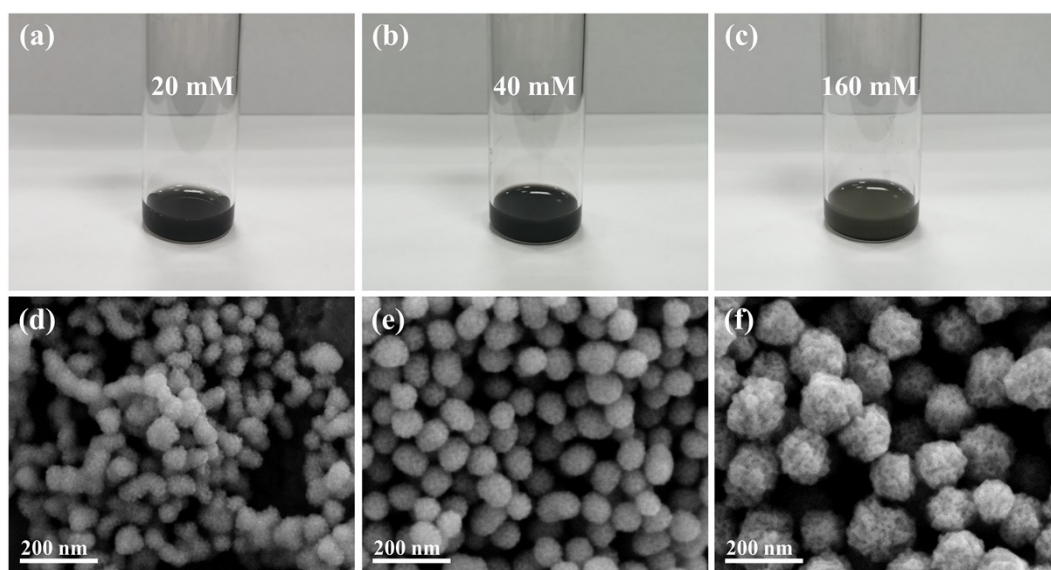

**Fig. S6** (a-c) Photographs of the colloidal suspensions of reaction solutions with different concentration of precursor. (d-f) SEM images of Au@mPd NFs from different concentration of precursor: (d) 20, (e) 40 and (f) 160 mM.

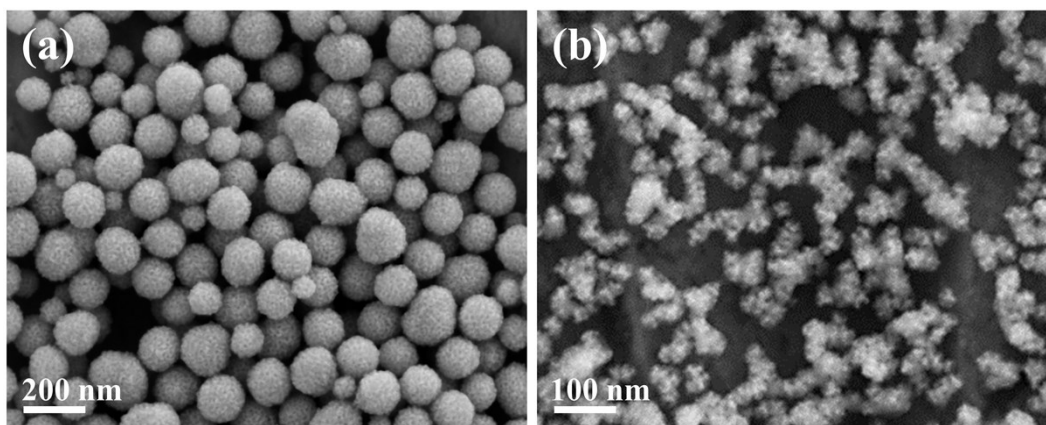

**Fig. S7** SEM images of the samples prepared with different amount of Au nanoparticles: (a) 10  $\mu\text{L}$  and (b) 200  $\mu\text{L}$ .

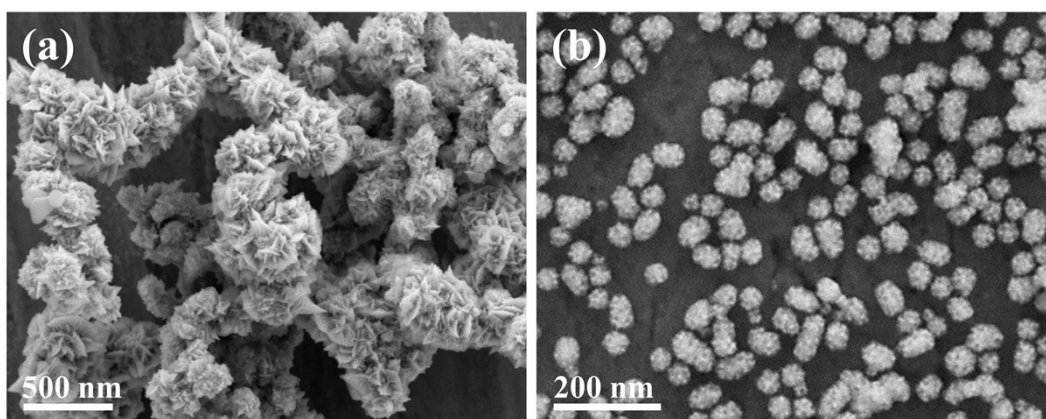

**Fig. S8** SEM images of the samples prepared without (a) PS-b-PEO and (b) HCl.

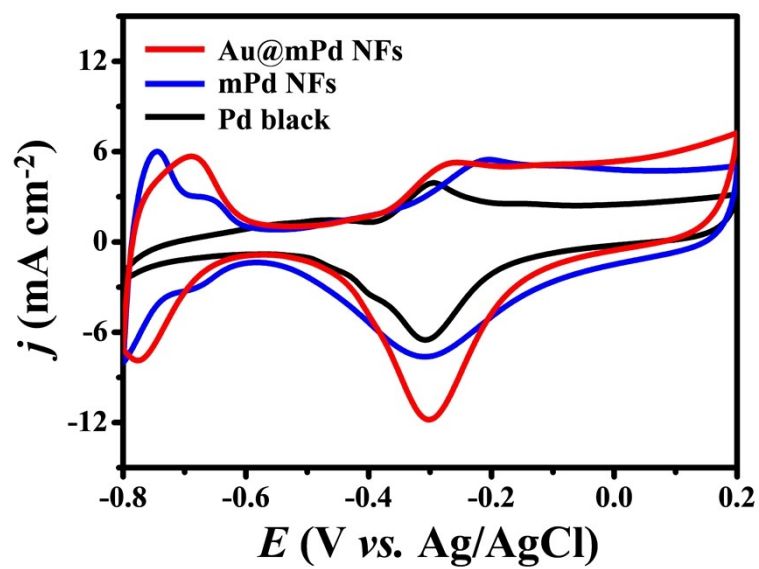

Fig. S9 CV curves of the different catalysts.

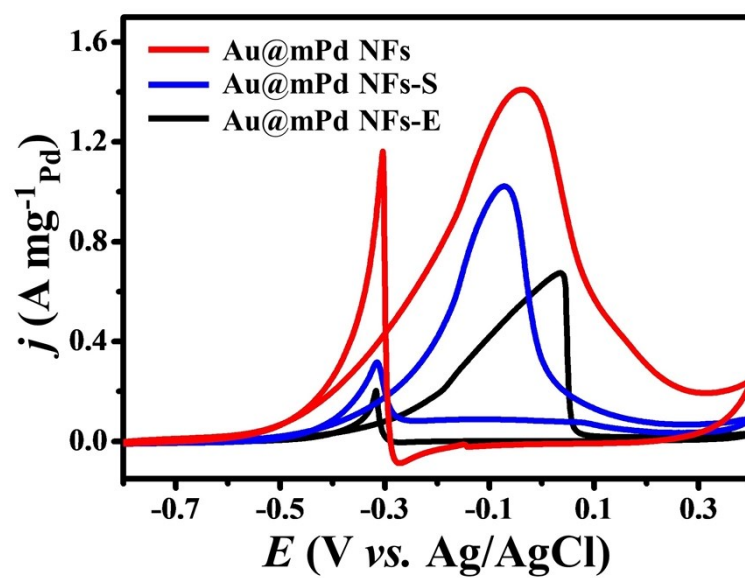

Fig. S10 Mass-normalized CV curves of different catalysts.



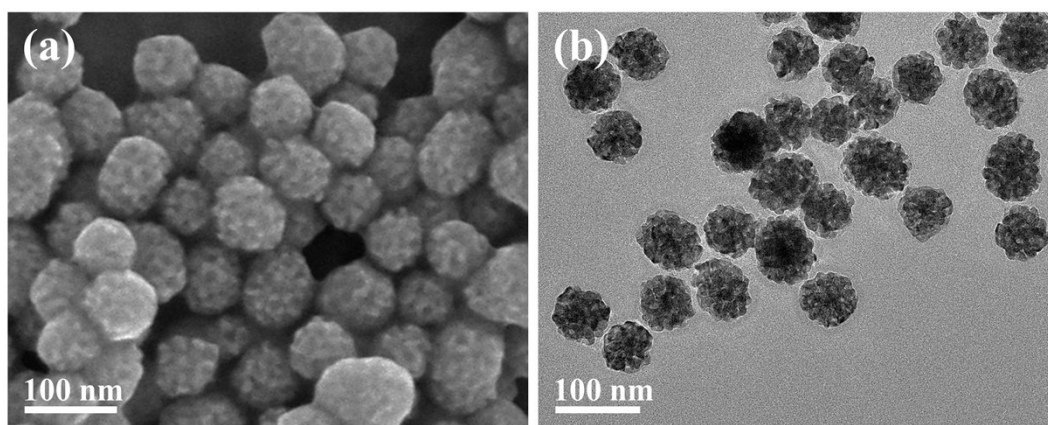

**Fig. S11** (a, b) SEM and TEM images of Au@mPd NFs after stability test.



**Table S1.** The specific activity and mass activity comparisons of MOR on various Pd-based electrocatalysts.

| Catalyst                          | specific activity<br>(mA cm <sup>-2</sup> ) | mass activity<br>(mA μg <sup>-1</sup> <sub>Pd</sub> ) | Ref.             |
|-----------------------------------|---------------------------------------------|-------------------------------------------------------|------------------|
| <b>Au@mPd NFs</b>                 | <b>4.57</b>                                 | <b>1.41</b>                                           | <b>This work</b> |
| Bowl-like PdCu                    | 3.32                                        | 1.46                                                  | 1                |
| PdCuCo / RGO                      | 0.92                                        | 1.06                                                  | 2                |
| Pd <sub>78</sub> Co <sub>22</sub> | 2.76                                        | 1.48                                                  | 3                |
| PdGa NSAs                         | 1.10                                        | 2.65                                                  | 4                |
| Pd <sub>3</sub> Rh <sub>1</sub>   | 4.00                                        | 0.44                                                  | 5                |
| echinus-like PdCu NCs             | 2.76                                        | 1.2021                                                | 6                |
| flower-like Pd particles          | 2.39                                        | /                                                     | 7                |
| Pd-4Er/C catalyst                 | 2.09                                        | /                                                     | 8                |

## References

- 1 S.-Q. Liu, Y.-T. Xu, J.-Q. Xie, G.-Q. Sheng, Y.-W. Zhu, X.-Z. Fu, R. Sun and C.-P. Wong, *ACS Appl. Energy Mater.*, 2018, **1**, 3323-3330.
- 2 F. Yang, B. Zhang, S. Dong, C. Wang, A. Feng, X. Fan and Y. Li, *J. Energy Chem.*, 2019, **29**, 72-78.
- 3 G. Sheng, J. Chen, H. Ye, Z. Hu, X.-Z. Fu, R. Sun, W. Huang and C.-P. Wong, *J. Colloid Interface Sci.*, 2018, **522**, 264-271.
- 4 H. Shang, H. Xu, C. Wang, L. Jin, C. Chen, G. Zhou, Y. Wang and Y. Du, *Nanoscale*, 2020, **12**, 3411-3417.
- 5 Q.-Y. Hu, R.-H. Zhang, D. Chen, Y.-F. Guo, W. Zhan, L.-M. Luo and X.-W. Zhou, *Int. J. Hydrogen Energy*, 2019, **44**, 16287-16296.
- 6 Z. Zhang, G. Ren, Y. Liu, Y. Liang, M. Wang, S. Wu and J. Shen, *Chem. Asian J.*, 2019, **14**, 4217-4222.
- 7 Z. Li, H. Gong, T. Mu and Y. Luan, *CrystEngComm*, 2014, **16**, 4038–4044.
- 8 D. Hua, L. Y. Zhang, K. Meng, Z. Jia, Y. Wang and T. Qi, *Ionics*, **2020**, 1-6.
